# Supplementary material for: Limosilactobacillus fermentum KAU0021 Abrogates Mono- and Polymicrobial Biofilms Formed by Candida albicans and Staphylococcus aureus
Source: MDPI journal article supplement (doi:10.3390/pharmaceutics15041079), 2023-03-27
Supplement: s1 [file s1]

Supplementary Data :

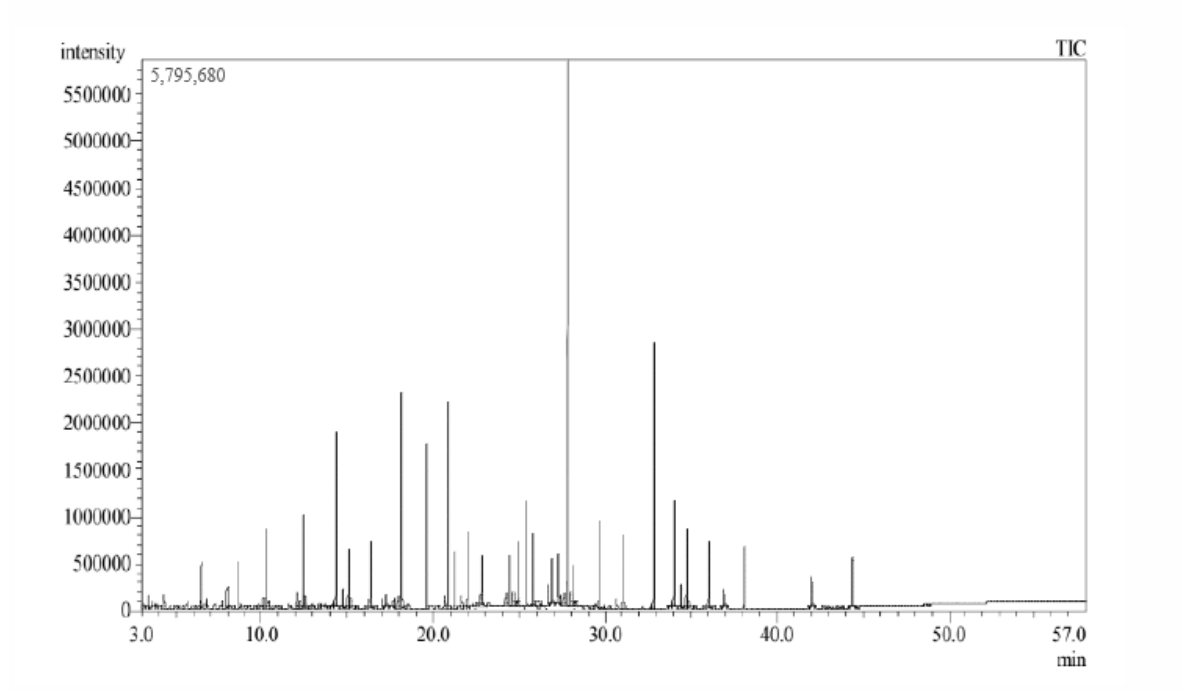

**Figure S1:** Total ion chromatogram (TIC) of LME<sup>KAU0021</sup>.

Supplementary Data :

**Table S1:** Chemical composition of the LME<sup>KAU0021</sup> obtained from *Limosilactobacillus fermentum* KAU0021

| S.No.                              | Metabolite <sup>#</sup>           | M.Wt          | Retention time | Percentage         |
|------------------------------------|-----------------------------------|---------------|----------------|--------------------|
| 1                                  | Octadecanoic acid                 | 284.48        | 6.323          | 1.65±0.016         |
| 2                                  | Hexadecanoic acid                 | 256.43        | 7.957          | 0.85±0.041         |
| 3                                  | Propanoic acid                    | 118.13        | 8.801          | 1.64±0.016         |
| 4                                  | Stearic acid                      | 284.48        | 10.254         | 2.45±0.028         |
| 5                                  | Myristic acid                     | 228.37        | 12.634         | 2.85±0.008         |
| 6                                  | <b>Acetic acid</b>                | <b>132.15</b> | <b>14.254</b>  | <b>4.75±0.018</b>  |
| 7                                  | Phenylacetic acid                 | 136.14        | 15.193         | 1.85±0.084         |
| 8                                  | 3-phenyllactic acid               | 166.17        | 16.327         | 1.94±0.048         |
| 9                                  | <b>Lactic acid</b>                | <b>90.08</b>  | <b>18.133</b>  | <b>5.75±0.020</b>  |
| 10                                 | <b>Oxalic acid</b>                | <b>90.03</b>  | <b>19.756</b>  | <b>4.37±0.033</b>  |
| 11                                 | <b>(Z)-7-Hexadecenal</b>          | <b>238.41</b> | <b>20.931</b>  | <b>5.45±0.021</b>  |
| 12                                 | Phenol,2,4-bis(1,1-dimethylethyl) | 278.5         | 21.131         | 1.55±0.028         |
| 13                                 | 4-aminobutyric acid               | 103.12        | 22.033         | 1.61±0.016         |
| 14                                 | Sebacic acid                      | 202.25        | 22.966         | 1.58±0.032         |
| 15                                 | 3-hydroxybutyric acid             | 104.10        | 24.531         | 1.45±0.040         |
| 16                                 | Hexadecanoic acid methyl ester    | 270.45        | 24.902         | 1.68±0.040         |
| 17                                 | 2-butenedioic acid                | 116.07        | 25.476         | 2.88±0.097         |
| 18                                 | Phosphoric acid                   | 97.99         | 25.875         | 1.96±0.048         |
| 19                                 | 2-hydroxyisovaleric acid          | 74.08         | 27.069         | 0.89±0.048         |
| 20                                 | 2-hydroxy isocaproic acid         | 122.12        | 27.243         | 0.94±0.032         |
| 21                                 | <b>Oleic acid</b>                 | <b>282.47</b> | <b>27.911</b>  | <b>15.86±0.013</b> |
| 22                                 | Valine                            | 117.15        | 29.842         | 2.34±0.032         |
| 23                                 | Malic acid                        | 134.08        | 31.108         | 2.23±0.036         |
| 24                                 | <b>Pyroglutamic acid</b>          | <b>129.04</b> | <b>32.916</b>  | <b>7.63±0.040</b>  |
| 25                                 | Succinic acid                     | 118.09        | 34.113         | 2.85±0.032         |
| 26                                 | 2,5-dihydroxyacetophenone         | 152.15        | 34.523         | 0.87±0.040         |
| 27                                 | Azelaic acid                      | 188.22        | 34.921         | 1.97±0.043         |
| 28                                 | Glutamic acid                     | 147.13        | 36.116         | 1.84±0.016         |
| 29                                 | Arabitol                          | 152.14        | 37.052         | 0.88±0.040         |
| 30                                 | Erythrose                         | 120.1         | 38.125         | 1.68±0.008         |
| 31                                 | Glucose                           | 180.15        | 42.083         | 0.86±0.297         |
| 32                                 | Citric acid                       | 192.12        | 44.304         | 1.88±0.064         |
| <b>Total percentage identified</b> |                                   |               |                | <b>88.98</b>       |

<sup>#</sup>The metabolites are listed according to the elution order. Unknown compounds and metabolites in <0.80% concentration have not been listed.
